# Supplementary material
Source: PubMed Central journal article supplement (PMC7176484)

## A Kanamycin

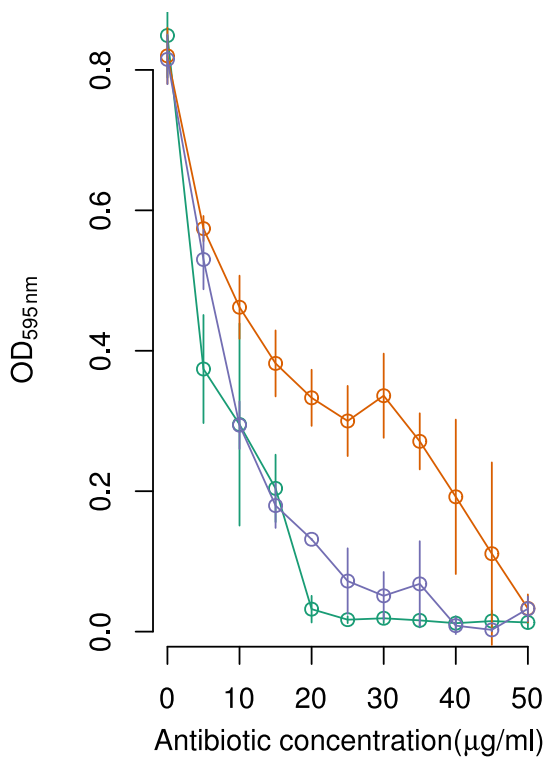

## B Ciprofloxacin

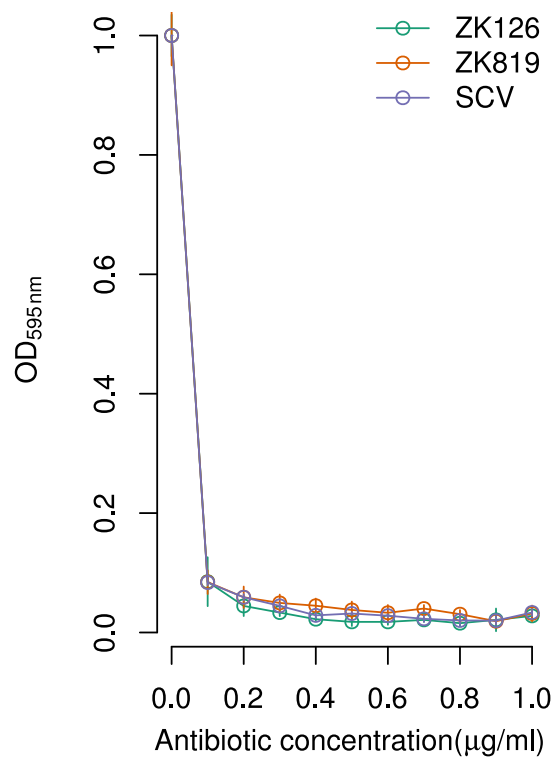

## C

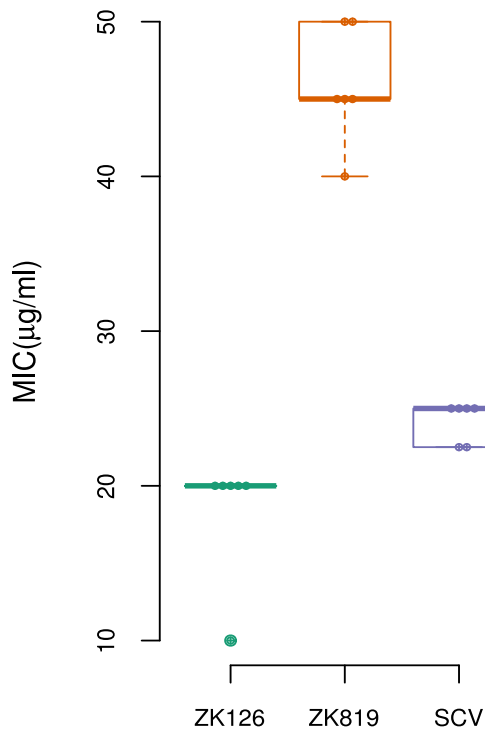

## D

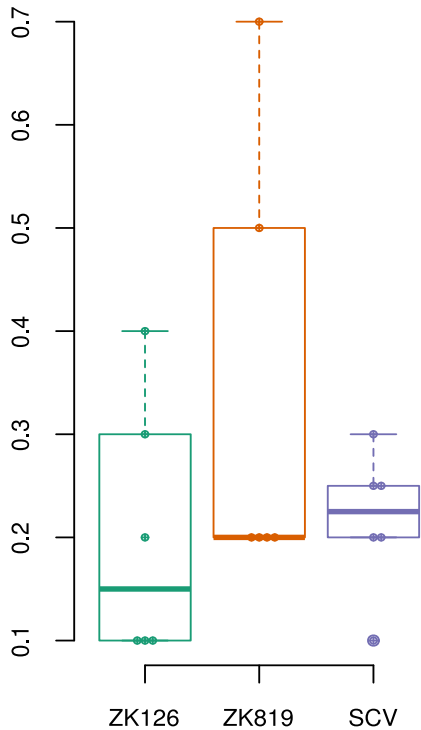

Supplement: EMS86242-supplement-Figure_S1.pdf [file EMS86242-supplement-Figure_S1.pdf]
