# Supplementary material
Source: PubMed Central journal article supplement (PMC7176484)

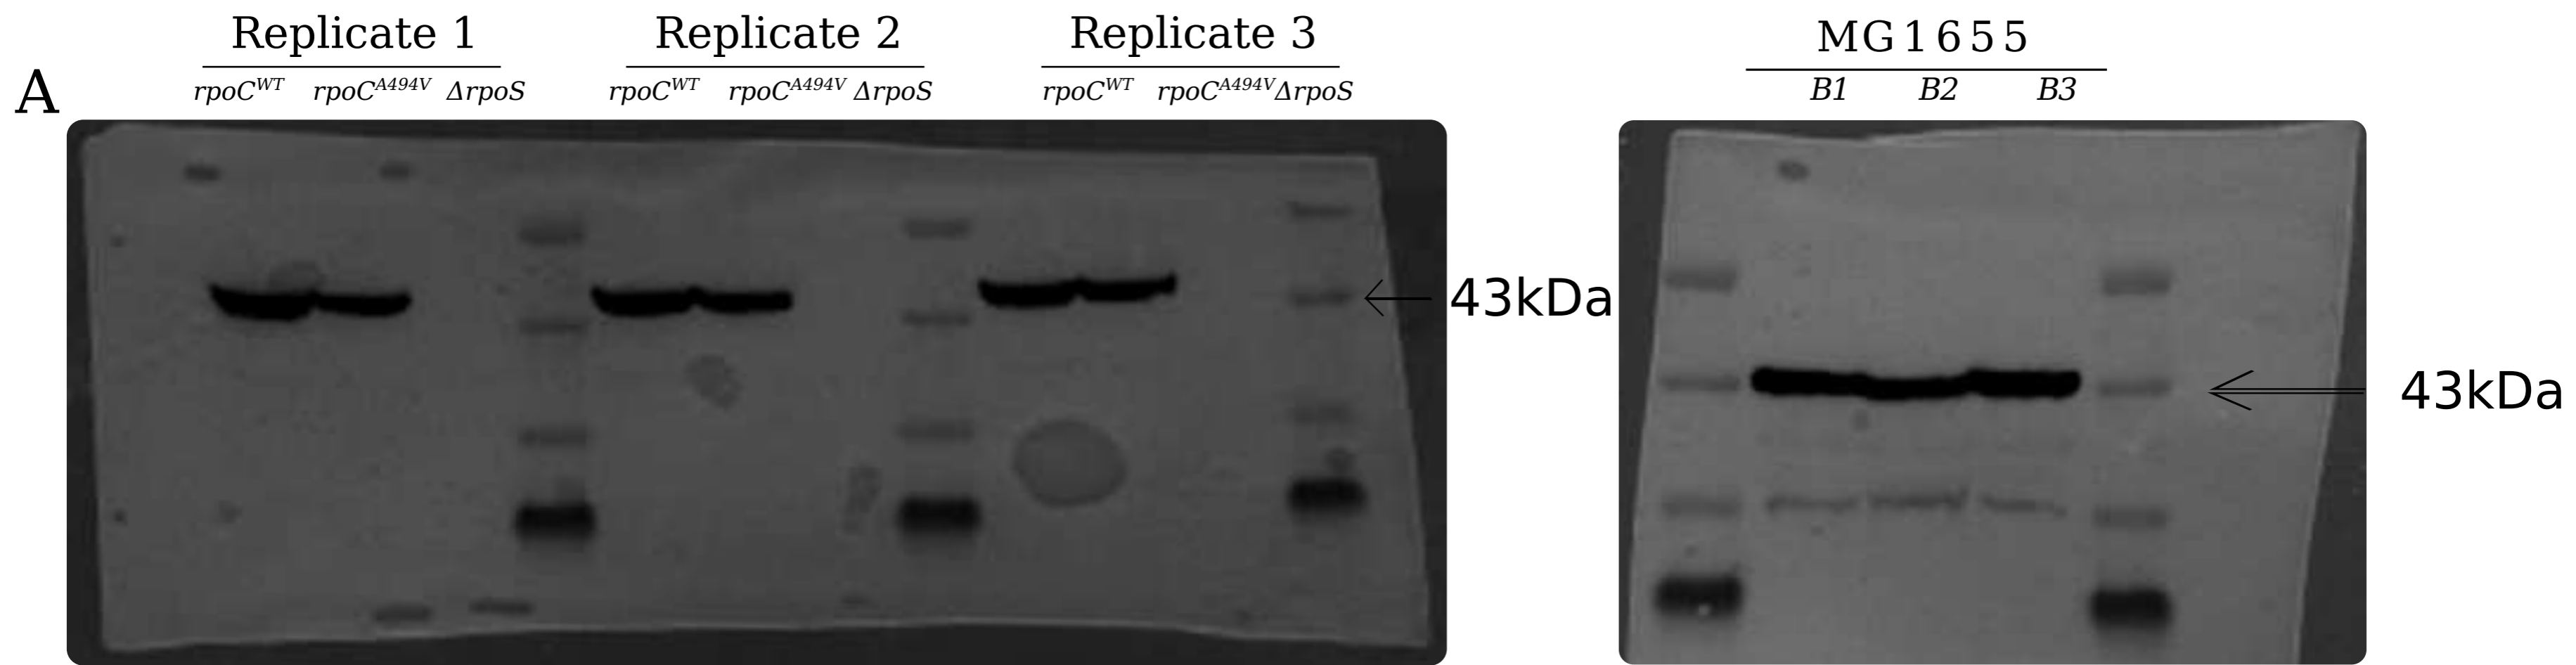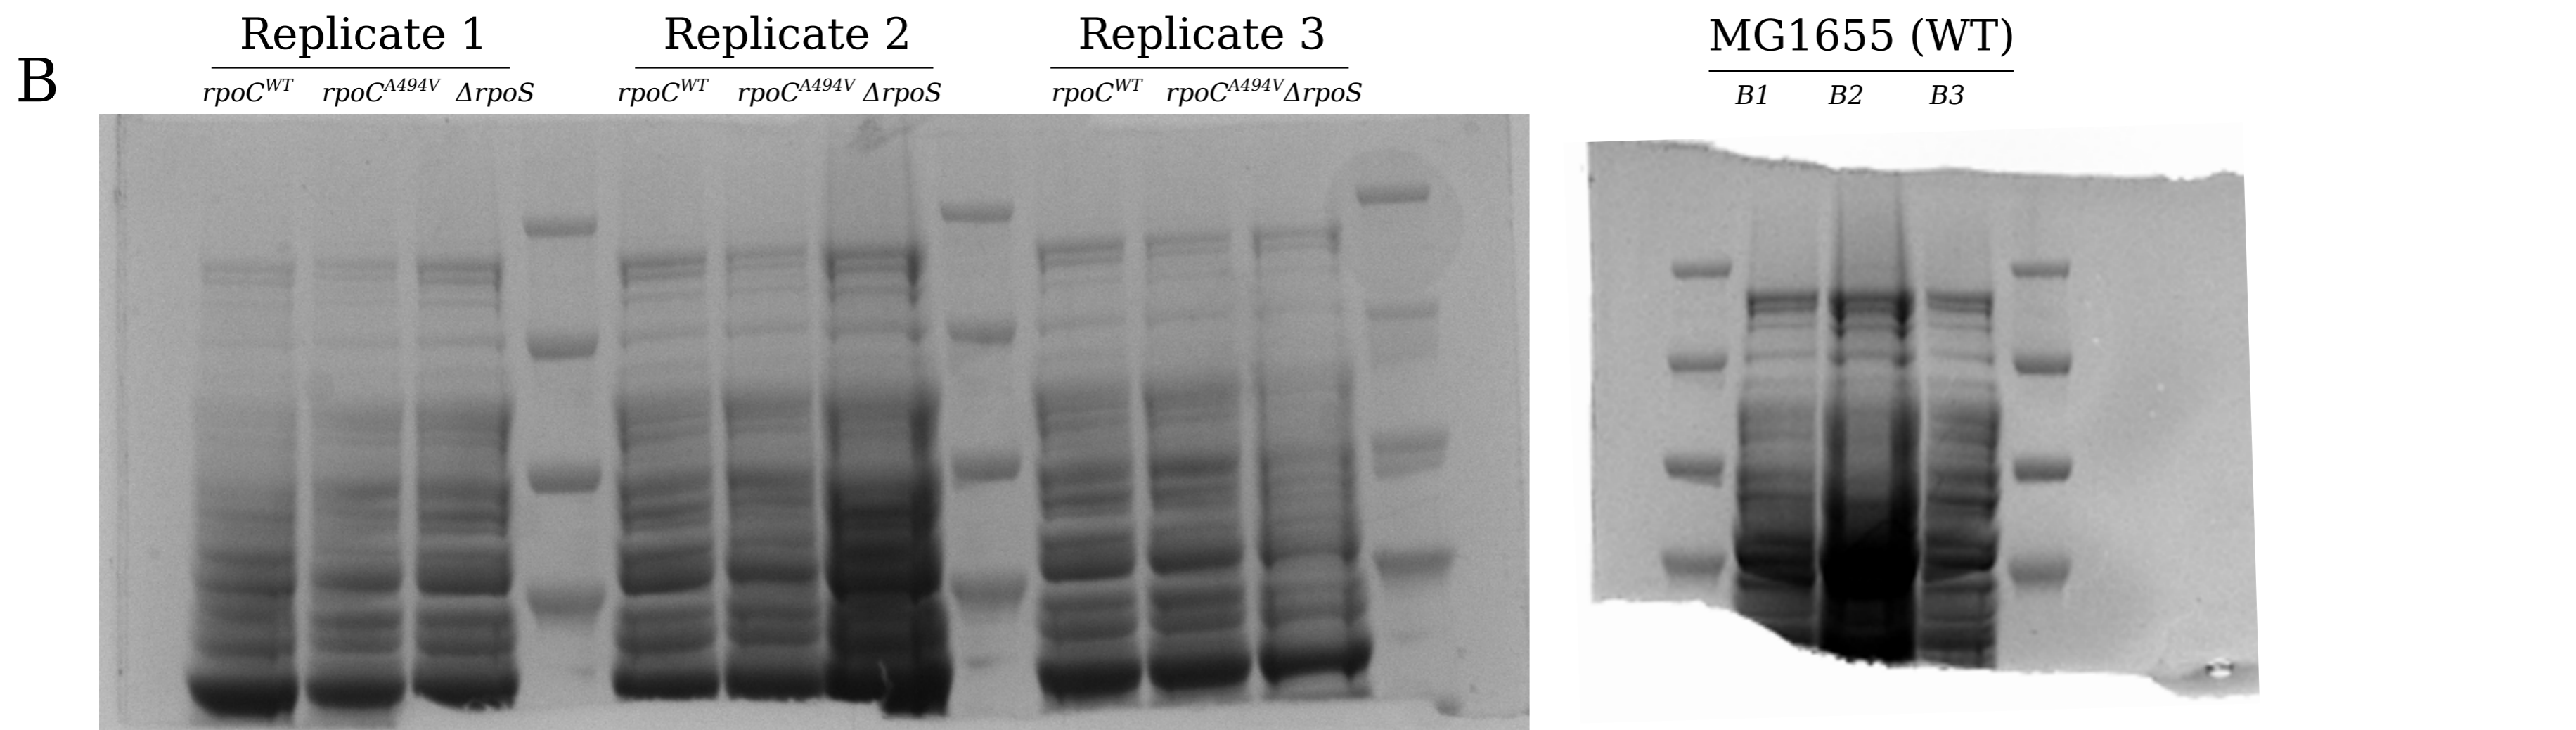

Supplement: EMS86242-supplement-Figure_S3.pdf [file EMS86242-supplement-Figure_S3.pdf]
