# Supplementary material
Source: PubMed Central journal article supplement (PMC7176484)
Supplement: EMS86242-supplement-Table_S1.pdf [file EMS86242-supplement-Table_S1.pdf]

| Strain                      | Forward                       | Reverse                      |
|-----------------------------|-------------------------------|------------------------------|
| <i>rpoC</i> re-sequencing   | 5'-TTACTCGTTATCAGAACCGCCAG-3' | 5'-TTATTAAAGTTTCTGAAAGCGC-3' |
| <i>araB</i> mRNA estimation | 5'-CAAGCACGGTTTTTCAGTG-3'     | 5'-GATTCTGTGCGAGCTTTGGC-3'   |
| <i>rpoA</i> mRNA estimation | 5'-CATCACGTAAGTCAACGAAAGC -3' | 5'-GCTGGTCATCGAAATGGAAAC-3'  |
