# Supplementary material
Source: PubMed Central journal article supplement (PMC7176484)
Supplement: EMS86242-supplement-Table_S3.pdf [file EMS86242-supplement-Table_S3.pdf]

**Table T3.1 (SCV, isolate 1)**

| position | mutation   | freq | annotation              | gene                                | description                                                                                                                                                                                                                                                                                                                                                                                                                                                                                                                                                                                                                                                                                                                                                                                                                                             |
|----------|------------|------|-------------------------|-------------------------------------|---------------------------------------------------------------------------------------------------------------------------------------------------------------------------------------------------------------------------------------------------------------------------------------------------------------------------------------------------------------------------------------------------------------------------------------------------------------------------------------------------------------------------------------------------------------------------------------------------------------------------------------------------------------------------------------------------------------------------------------------------------------------------------------------------------------------------------------------------------|
| 66457    | C→A        | 100% | V32F<br>(GTT→TTT)       | <i>araD</i> ←                       | L-ribulose-5-phosphate 4-epimerase                                                                                                                                                                                                                                                                                                                                                                                                                                                                                                                                                                                                                                                                                                                                                                                                                      |
| 97880    | C→T        | 100% | S265F<br>(TCC→TTC)      | <i>murD</i> →                       | UDP-N-acetylmuramoyl-L-alanine:D-glutamate ligase                                                                                                                                                                                                                                                                                                                                                                                                                                                                                                                                                                                                                                                                                                                                                                                                       |
| 167632   | C→A        | 100% | P50Q<br>(CCG→CAG)       | <i>fhuA</i> →                       | ferrichrome outer membrane transporter                                                                                                                                                                                                                                                                                                                                                                                                                                                                                                                                                                                                                                                                                                                                                                                                                  |
| 274547   | A→G        | 100% | intergenic<br>(-206/-2) | <i>insH</i> ← / →<br><i>mmuP</i>    | IS5 transposase and trans-activator/S-methylmethionine transporter                                                                                                                                                                                                                                                                                                                                                                                                                                                                                                                                                                                                                                                                                                                                                                                      |
| 274731   | Δ97,240 bp | 100% |                         | [ <i>mmuP</i> ]-<br>[ <i>mhpD</i> ] | <b>90 genes</b><br>[ <i>mmuP</i> ],<br><i>mmuM</i> , <i>afuC</i> ,<br><i>afuB</i> , <i>insB</i> ,<br><i>insA</i> , <i>ykgN</i> ,<br><i>yagB</i> , <i>yagA</i> ,<br><i>yagE</i> , <i>yagF</i> ,<br><i>yagG</i> , <i>yagH</i> ,<br><i>yagI</i> , <i>argF</i> ,<br><i>insB</i> , <i>insA</i> ,<br><i>yagJ</i> , <i>yagK</i> ,<br><i>yagL</i> , <i>yagM</i> ,<br><i>yagN</i> , <i>intF</i> ,<br><i>yagP</i> , <i>yagQ</i> ,<br><i>yagR</i> , <i>yagS</i> ,<br><i>yagT</i> , <i>yagU</i> ,<br><i>ykgJ</i> , <i>yagV</i> ,<br><i>yagW</i> , <i>yagX</i> ,<br><i>yagY</i> , <i>yagZ</i> ,<br><i>ykgK</i> , <i>ykgL</i> ,<br><i>Y75_p4288</i> ,<br><i>Y75_p4289</i> ,<br><i>eaeH</i> , <i>insE</i> ,<br><i>insF</i> , <i>ykgA</i> ,<br><i>ykgB</i> , <i>ykgI</i> ,<br><i>ykgC</i> , <i>ykgD</i> ,<br><i>ykgE</i> , <i>ykgF</i> ,<br><i>ykgG</i> , <i>ykgH</i> , |

| position | mutation  | freq | annotation              | gene                             | description                                                                                                                                                                                                                                       |
|----------|-----------|------|-------------------------|----------------------------------|---------------------------------------------------------------------------------------------------------------------------------------------------------------------------------------------------------------------------------------------------|
|          |           |      |                         |                                  | <i>betA, betB, betI, betT, yahA, yahB, yahC, yahD, yahE, yahF, yahG, yahH, yahI, yahJ, yahK, yahL, yahM, yahN, yahO, prpR, prpB, prpC, prpD, prpE, codB, codA, cynR, cynT, cynS, cynX, lacA, lacY, lacZ, lacI, mhpR, mhpA, mhpB, mhpC, [mhpD]</i> |
| 547694   | A→G       | 100% | intergenic (+123/-1156) | <i>fdrA</i> → / →<br><i>ylbF</i> | acyl-CoA synthetase with NAD(P)-binding Rossmann-fold domain/hypothetical protein                                                                                                                                                                 |
| 547831   | +G        | 100% | intergenic (+260/-1019) | <i>fdrA</i> → / →<br><i>ylbF</i> | acyl-CoA synthetase with NAD(P)-binding Rossmann-fold domain/hypothetical protein                                                                                                                                                                 |
| 556858   | A→T       | 100% | L36Q (CTG→CAG)          | <i>fold</i> ←                    | bifunctional 5,10-methylene-tetrahydrofolate dehydrogenase/5,10-methylene-tetrahydrofolate cyclohydrolase                                                                                                                                         |
| 569996   | G→C       | 100% | intergenic (+345/-120)  | <i>ybcK</i> → / →<br><i>ybcL</i> | recombinase/kinase inhibitor                                                                                                                                                                                                                      |
| 654214   | Δ1,199 bp | 100% |                         | <i>insH</i>                      | <i>insH</i>                                                                                                                                                                                                                                       |

| position | mutation   | freq  | annotation                | gene                             | description                                                                                                                                                                                                                                                                                                                                    |
|----------|------------|-------|---------------------------|----------------------------------|------------------------------------------------------------------------------------------------------------------------------------------------------------------------------------------------------------------------------------------------------------------------------------------------------------------------------------------------|
| 749354   | C→A        | 100%  | P17P<br>(CCG→CCT)         | <i>ybgO</i> ←                    | fimbrial-like<br>adhesin protein                                                                                                                                                                                                                                                                                                               |
| 758440   | C→A        | 100%  | F110L<br>(TTC→TTA)        | <i>sdhB</i> →                    | succinate<br>dehydrogenase,<br>FeS subunit                                                                                                                                                                                                                                                                                                     |
| 887234   | C→A        | 100%  | A176A<br>(GCG→GCT)        | <i>ybjJ</i> ←                    | transporter                                                                                                                                                                                                                                                                                                                                    |
| 987574   | G→T        | 100%  | intergenic<br>(-170/+433) | <i>ompF</i> ← / ←<br><i>asnS</i> | outer<br>membrane<br>porin 1a<br>(Ia;b;F)/aspara<br>ginyl tRNA<br>synthetase                                                                                                                                                                                                                                                                   |
| 1093686  | T→C        | 100%  | V130A<br>(GTA→GCA)        | <i>ycdT</i> →                    | diguanylate<br>cyclase                                                                                                                                                                                                                                                                                                                         |
| 1097580  | C→T        | 20.7% | intergenic<br>(+329/+226) | <i>ycdU</i> → / ←<br><i>serX</i> | inner<br>membrane<br>protein/tRNA-<br>Ser                                                                                                                                                                                                                                                                                                      |
| 1170573  | C→T        | 100%  | intergenic<br>(-164/-77)  | <i>ycfQ</i> ← / →<br><i>ycfR</i> | DNA-binding<br>transcriptional<br>regulator/hypot<br>hetical protein                                                                                                                                                                                                                                                                           |
| 1301041  | Δ1,336 bp  | 100%  |                           | <i>insC-insD</i>                 | <i>insC</i> , <i>insD</i>                                                                                                                                                                                                                                                                                                                      |
| 1318876  | G→A        | 100%  | P21S<br>(CCT→TCT)         | <i>trpA</i> ←                    | tryptophan<br>synthase<br>subunit alpha                                                                                                                                                                                                                                                                                                        |
| 1413639  | Δ23,060 bp | 100%  |                           | <i>[ydaO]-ynaE</i>               | <b>30 genes</b><br><i>[ydaO], intR,</i><br><i>ydaQ, ydaC,</i><br><i>lar, recT, recE,</i><br><i>racC, ydaE,</i><br><i>kil, sieB, ydaF,</i><br><i>ydaG, racR,</i><br><i>ydaS, ydaT,</i><br><i>ydaU, ydaV,</i><br><i>ydaW, rzpR,</i><br><i>rzoR, trkG,</i><br><i>ynaK, ydaY,</i><br><i>ynaA, insH,</i><br><i>stfR, tfaR,</i><br><i>pinR, ynaE</i> |
| 1483588  | G→A        | 100%  | L322L<br>(CTG→CTA)        | <i>ynbD</i> →                    | phosphatase,<br>inner                                                                                                                                                                                                                                                                                                                          |

| position | mutation  | freq  | annotation               | gene                             | description                                                 |
|----------|-----------|-------|--------------------------|----------------------------------|-------------------------------------------------------------|
|          |           |       |                          |                                  | membrane protein                                            |
| 1496775  | Δ1 bp     | 100%  | coding (11/924 nt)       | <i>ydcl</i> ←                    | DNA-binding transcriptional regulator                       |
| 1615814  | C→A       | 100%  | D202Y (GAC→TAC)          | <i>yneI</i> ←                    | aldehyde dehydrogenase                                      |
| 1669599  | Δ1 bp     | 100%  | coding (680/1221 nt)     | <i>dgsA</i> ←                    | DNA-binding transcriptional repressor                       |
| 1724327  | Δ3 bp     | 12.6% | coding (493-495/2013 nt) | <i>ydhK</i> →                    | inner membrane protein                                      |
| 1844073  | G→A       | 100%  | intergenic (-224/-12)    | <i>ynjH</i> ← / →<br><i>gdhA</i> | hypothetical protein/glutamate dehydrogenase, NADP-specific |
| 1918872  | T→A       | 100%  | S301T (TCC→ACC)          | <i>yebS</i> →                    | inner membrane protein                                      |
| 1973476  | G→A       | 100%  | L310L (CTC→CTT)          | <i>tar</i> ←                     | methyl-accepting chemotaxis protein II                      |
| 2005401  | C→T       | 100%  | E115K (GAA→AAA)          | <i>fliC</i> ←                    | flagellar filament structural protein                       |
| 2170094  | C→A       | 100%  | intergenic (-437/+32)    | <i>ogrK</i> ← / ←<br><i>yegR</i> | DNA-binding transcriptional regulator/hypothetical protein  |
| 2320795  | Δ1,336 bp | 100%  |                          | <i>insD-insC</i>                 | <i>insD, insC</i>                                           |
| 2406075  | C→T       | 100%  | V51I (GTT→ATT)           | <i>nuoF</i> ←                    | NADH:ubiquinone oxidoreductase, chain F                     |
| 2416102  | G→A       | 100%  | L233L (CTG→TTG)          | <i>yfbS</i> ←                    | transporter                                                 |
| 2538628  | C→T       | 100%  | T258T (ACC→ACT)          | <i>cysK</i> →                    | cysteine synthase A, O-acetylserine sulfhydrylase A         |

| position | mutation  | freq  | annotation               | gene                             | description                                                          |
|----------|-----------|-------|--------------------------|----------------------------------|----------------------------------------------------------------------|
|          |           |       |                          |                                  | subunit                                                              |
| 2865228  | A→G       | 3.8%  | L288P<br>(CTG→CCG)       | <i>rpoS</i> ←                    | RNA polymerase, sigma S (sigma 38) factor                            |
| 2865274  | +46 bp    | 76.7% | coding<br>(817/876 nt)   | <i>rpoS</i> ←                    | RNA polymerase, sigma S (sigma 38) factor                            |
| 2865278  | +92 bp    | 61.6% | coding<br>(813/876 nt)   | <i>rpoS</i> ←                    | RNA polymerase, sigma S (sigma 38) factor                            |
| 2866111  | A→G       | 100%  | intergenic<br>(-21/+159) | <i>rpoS</i> ← / ←<br><i>nlpD</i> | RNA polymerase, sigma S (sigma 38) factor/outer membrane lipoprotein |
| 3003330  | G→A       | 100%  | L371L<br>(CTC→CTT)       | <i>ygeV</i> ←                    | DNA-binding transcriptional regulator                                |
| 3049815  | G→T       | 100%  | R387S<br>(CGC→AGC)       | <i>visC</i> ←                    | oxidoreductase                                                       |
| 3397813  | C→G       | 100%  | D141H<br>(GAT→CAT)       | <i>yhdE</i> ←                    | hypothetical protein                                                 |
| 3449851  | G→A       | 100%  | A494V<br>(GCG→GTG)       | <i>rpoC</i> ←                    | RNA polymerase, beta prime subunit                                   |
| 3742936  | Δ1,336 bp | 100%  |                          | <i>insD-insC</i>                 | <i>insD, insC</i>                                                    |
| 3746911  | Δ1,199 bp | 100%  |                          | <i>insH</i>                      | <i>insH</i>                                                          |
| 3750122  | Δ1 bp     | 96.8% | coding<br>(365/1416 nt)  | <i>tnaA</i> ←                    | tryptophanase/L-cysteine desulfhydrase, PLP-dependent                |
| 3750123  | C→T       | 3.2%  | G122S<br>(GGC→AGC)       | <i>tnaA</i> ←                    | tryptophanase/L-cysteine desulfhydrase, PLP-dependent                |
| 3750591  | Δ1,199 bp | 100%  |                          | <i>insH</i>                      | <i>insH</i>                                                          |
| 3898657  | C→G       | 100%  | L259V                    | <i>yiaJ</i> →                    | DNA-binding                                                          |

| position | mutation  | freq | annotation                 | gene                             | description                                                                                                                          |
|----------|-----------|------|----------------------------|----------------------------------|--------------------------------------------------------------------------------------------------------------------------------------|
|          |           |      | (CTG→GTG)                  |                                  | transcriptional repressor                                                                                                            |
| 3958123  | Δ34 bp    | 100% | coding (1156-1189/1287 nt) | <i>dctA</i> →                    | C4-dicarboxylic acid, orotate and citrate transporter                                                                                |
| 4090749  | A→T       | 100% | Q135L (CAG→CTG)            | <i>malQ</i> →                    | 4-alpha-glucanotransferase                                                                                                           |
| 4165991  | A→C       | 100% | K43T (AAA→ACA)             | <i>rpsL</i> →                    | 30S ribosomal protein S12                                                                                                            |
| 4310363  | Δ1,199 bp | 100% |                            | <i>insH</i> –[ <i>alsK</i> ]     | <i>insH</i> , [ <i>alsK</i> ]                                                                                                        |
| 4371271  | Δ2 bp     | 100% | intergenic (-6/+299)       | <i>dcuA</i> ← / ←<br><i>aspA</i> | C4-dicarboxylate antiporter/aspartate ammonia-lyase                                                                                  |
| 4546535  | T→A       | 100% | intergenic (+296/-182)     | <i>fimB</i> → / →<br><i>fimE</i> | tyrosine recombinase/inversion of on/off regulator of <i>fimA</i> /tyrosine recombinase/inversion of on/off regulator of <i>fimA</i> |

**Table 3.2 (SCV, isolate 2)**

| position | mutation | freq | annotation      | gene          | description                                                                 |
|----------|----------|------|-----------------|---------------|-----------------------------------------------------------------------------|
| 66457    | C→A      | 100% | V32F (GTT→TTT)  | <i>AraD</i> ← | L-ribulose-5-phosphate 4-epimerase                                          |
| 97880    | C→T      | 100% | S265F (TCC→TTC) | <i>murD</i> → | UDP-N-acetyl muramoyl-L-alanine:D-glutamate ligase                          |
| 104633   | A→C      | 1.8% | I218L (ATC→CTC) | <i>ftsA</i> → | ATP-binding cell division protein involved in recruitment of FtsK to Z ring |
| 167632   | C→A      | 100% | P50Q            | <i>fhuA</i> → | ferrichrome                                                                 |

| position | mutation   | freq | annotation           | gene                                | description                                                                                                                                                                                                                                                                                                                                                                                                                                                                                                                                                                                                                                                                                                                                                                                                                                                                                                                                                                                                                                                                                                                                                                   |
|----------|------------|------|----------------------|-------------------------------------|-------------------------------------------------------------------------------------------------------------------------------------------------------------------------------------------------------------------------------------------------------------------------------------------------------------------------------------------------------------------------------------------------------------------------------------------------------------------------------------------------------------------------------------------------------------------------------------------------------------------------------------------------------------------------------------------------------------------------------------------------------------------------------------------------------------------------------------------------------------------------------------------------------------------------------------------------------------------------------------------------------------------------------------------------------------------------------------------------------------------------------------------------------------------------------|
|          |            |      | (CCG→CAG)            |                                     | outer membrane transporter                                                                                                                                                                                                                                                                                                                                                                                                                                                                                                                                                                                                                                                                                                                                                                                                                                                                                                                                                                                                                                                                                                                                                    |
| 274547   | A→G        | 100% | intergenic (-206/-2) | <i>insH</i> ← / → <i>mmuP</i>       | IS5 transposase and trans-activator/S-methylmethionine transporter                                                                                                                                                                                                                                                                                                                                                                                                                                                                                                                                                                                                                                                                                                                                                                                                                                                                                                                                                                                                                                                                                                            |
| 274733   | Δ97,240 bp | 100% |                      | [ <i>mmuP</i> ]-<br>[ <i>mhpD</i> ] | <b>90 genes</b><br>[ <i>mmuP</i> ],<br><i>mmuM</i> , <i>afuC</i> ,<br><i>afuB</i> , <i>insB</i> ,<br><i>insA</i> , <i>ykgN</i> ,<br><i>yagB</i> , <i>yagA</i> ,<br><i>yagE</i> , <i>yagF</i> ,<br><i>yagG</i> , <i>yagH</i> ,<br><i>yagI</i> , <i>argF</i> ,<br><i>insB</i> , <i>insA</i> ,<br><i>yagJ</i> , <i>yagK</i> ,<br><i>yagL</i> , <i>yagM</i> ,<br><i>yagN</i> , <i>intF</i> ,<br><i>yagP</i> , <i>yagQ</i> ,<br><i>yagR</i> , <i>yagS</i> ,<br><i>yagT</i> , <i>yagU</i> ,<br><i>ykgJ</i> , <i>yagV</i> ,<br><i>yagW</i> , <i>yagX</i> ,<br><i>yagY</i> , <i>yagZ</i> ,<br><i>ykgK</i> , <i>ykgL</i> ,<br><i>Y75_p4288</i> ,<br><i>Y75_p4289</i> ,<br><i>eaeH</i> , <i>insE</i> ,<br><i>insF</i> , <i>ykgA</i> ,<br><i>ykgB</i> , <i>ykgI</i> ,<br><i>ykgC</i> , <i>ykgD</i> ,<br><i>ykgE</i> , <i>ykgF</i> ,<br><i>ykgG</i> , <i>ykgH</i> ,<br><i>betA</i> , <i>betB</i> ,<br><i>betI</i> , <i>betT</i> ,<br><i>yahA</i> , <i>yahB</i> ,<br><i>yahC</i> , <i>yahD</i> ,<br><i>yahE</i> , <i>yahF</i> ,<br><i>yahG</i> , <i>yahH</i> ,<br><i>yahI</i> , <i>yahJ</i> ,<br><i>yahK</i> , <i>yahL</i> ,<br><i>yahM</i> , <i>yahN</i> ,<br><i>yahO</i> , <i>prpR</i> , |

| position | mutation  | freq | annotation              | gene                             | description                                                                                                               |
|----------|-----------|------|-------------------------|----------------------------------|---------------------------------------------------------------------------------------------------------------------------|
|          |           |      |                         |                                  | <i>prpB, prpC, prpD, prpE, codB, codA, cynR, cynT, cynS, cynX, lacA, lacY, lacZ, lacI, mhpR, mhpA, mhpB, mhpC, [mhpD]</i> |
| 547694   | A→G       | 100% | intergenic (+123/-1156) | <i>fdrA</i> → / →<br><i>ylbF</i> | acyl-CoA synthetase with NAD(P)-binding Rossmann-fold domain/hypothetical protein                                         |
| 547831   | +G        | 100% | intergenic (+260/-1019) | <i>fdrA</i> → / →<br><i>ylbF</i> | acyl-CoA synthetase with NAD(P)-binding Rossmann-fold domain/hypothetical protein                                         |
| 556858   | A→T       | 100% | L36Q (CTG→CAG)          | <i>fold</i> ←                    | bifunctional 5,10-methylene-tetrahydrofolate dehydrogenase/5,10-methylene-tetrahydrofolate cyclohydrolase                 |
| 569996   | G→C       | 100% | intergenic (+345/-120)  | <i>ybcK</i> → / →<br><i>ybcL</i> | recombinase/kinase inhibitor                                                                                              |
| 654214   | Δ1,199 bp | 100% |                         | <i>insH</i>                      | <i>insH</i>                                                                                                               |
| 749354   | C→A       | 100% | P17P (CCG→CCT)          | <i>ybgO</i> ←                    | fimbrial-like adhesin protein                                                                                             |
| 758440   | C→A       | 100% | F110L (TTC→TTA)         | <i>sdhB</i> →                    | succinate dehydrogenase, FeS subunit                                                                                      |
| 887234   | C→A       | 100% | A176A (GCG→GCT)         | <i>ybjJ</i> ←                    | transporter                                                                                                               |
| 987574   | G→T       | 100% | intergenic              | <i>ompF</i> ← / ←                | outer                                                                                                                     |



| position | mutation   | freq  | annotation             | gene                             | description                                                                                                                                                                                                  |
|----------|------------|-------|------------------------|----------------------------------|--------------------------------------------------------------------------------------------------------------------------------------------------------------------------------------------------------------|
|          |            |       | (-170/+433)            | <i>asnS</i>                      | membrane porin 1a (Ia;b;F)/asparaginyl tRNA synthetase                                                                                                                                                       |
| 1093686  | T→C        | 100%  | V130A (GTA→GCA)        | <i>ycdT</i> →                    | diguanylate cyclase                                                                                                                                                                                          |
| 1097580  | C→T        | 23.7% | intergenic (+329/+226) | <i>ycdU</i> → / ←<br><i>serX</i> | inner membrane protein/tRNA-Ser                                                                                                                                                                              |
| 1170573  | C→T        | 100%  | intergenic (-164/-77)  | <i>ycfQ</i> ← / →<br><i>ycfR</i> | DNA-binding transcriptional regulator/hypothetical protein                                                                                                                                                   |
| 1301041  | Δ1,336 bp  | 100%  |                        | <i>insC-insD</i>                 | <i>insC, insD</i>                                                                                                                                                                                            |
| 1318876  | G→A        | 100%  | P21S (CCT→TCT)         | <i>trpA</i> ←                    | tryptophan synthase subunit alpha                                                                                                                                                                            |
| 1413639  | Δ23,060 bp | 100%  |                        | <i>[ydaO]-ynaE</i>               | <b>30 genes</b><br><i>[ydaO], intR, ydaQ, ydaC, lar, recT, recE, racC, ydaE, kil, sieB, ydaF, ydaG, racR, ydaS, ydaT, ydaU, ydaV, ydaW, rzpR, rzoR, trkG, ynaK, ydaY, ynaA, insH, stfR, tfaR, pinR, ynaE</i> |
| 1483588  | G→A        | 100%  | L322L (CTG→CTA)        | <i>ynbD</i> →                    | phosphatase, inner membrane protein                                                                                                                                                                          |
| 1496775  | Δ1 bp      | 100%  | coding (11/924 nt)     | <i>ydcl</i> ←                    | DNA-binding transcriptional regulator                                                                                                                                                                        |
| 1615814  | C→A        | 100%  | D202Y (GAC→TAC)        | <i>yneI</i> ←                    | aldehyde dehydrogenase                                                                                                                                                                                       |
| 1669599  | Δ1 bp      | 100%  | coding                 | <i>dgsA</i> ←                    | DNA-binding                                                                                                                                                                                                  |

| position | mutation  | freq | annotation             | gene                             | description                                                         |
|----------|-----------|------|------------------------|----------------------------------|---------------------------------------------------------------------|
|          |           |      | (680/1221 nt)          |                                  | transcriptional repressor                                           |
| 1844073  | G→A       | 100% | intergenic (-224/-12)  | <i>ynjH</i> ← / →<br><i>gdhA</i> | hypothetical protein/glutamate dehydrogenase, NADP-specific         |
| 1918872  | T→A       | 100% | S301T (TCC→ACC)        | <i>yebS</i> →                    | inner membrane protein                                              |
| 1973476  | G→A       | 100% | L310L (CTC→CTT)        | <i>tar</i> ←                     | methyl-accepting chemotaxis protein II                              |
| 2005401  | C→T       | 100% | E115K (GAA→AAA)        | <i>fliC</i> ←                    | flagellar filament structural protein                               |
| 2170094  | C→A       | 100% | intergenic (-437/+32)  | <i>ogrK</i> ← / ←<br><i>yegR</i> | DNA-binding transcriptional regulator/hypothetical protein          |
| 2178210  | A→C       | 3.0% | intergenic (+179/+183) | <i>insH</i> → / ←<br><i>gatZ</i> | IS5 element protein/D-tagatose 1,6-bisphosphate aldolase 2, subunit |
| 2320795  | Δ1,336 bp | 100% |                        | <i>insD-insC</i>                 | <i>insD, insC</i>                                                   |
| 2406075  | C→T       | 100% | V51I (GTT→ATT)         | <i>nuoF</i> ←                    | NADH:ubiquinone oxidoreductase, chain F                             |
| 2416102  | G→A       | 100% | L233L (CTG→TTG)        | <i>yfbS</i> ←                    | transporter                                                         |
| 2538628  | C→T       | 100% | T258T (ACC→ACT)        | <i>cysK</i> →                    | cysteine synthase A, O-acetylserine sulfhydrylase A subunit         |
| 2865228  | A→G       | 2.5% | L288P (CTG→CCG)        | <i>rpoS</i> ←                    | RNA polymerase, sigma S (sigma 38) factor                           |

| position | mutation  | freq  | annotation                    | gene                             | description                                                          |
|----------|-----------|-------|-------------------------------|----------------------------------|----------------------------------------------------------------------|
| 2865274  | +46 bp    | 76.2% | coding<br>(817/876 nt)        | <i>rpoS</i> ←                    | RNA polymerase, sigma S (sigma 38) factor                            |
| 2865278  | +92 bp    | 57.6% | coding<br>(813/876 nt)        | <i>rpoS</i> ←                    | RNA polymerase, sigma S (sigma 38) factor                            |
| 2866111  | A→G       | 100%  | intergenic<br>(-21/+159)      | <i>rpoS</i> ← / ←<br><i>nlpD</i> | RNA polymerase, sigma S (sigma 38) factor/outer membrane lipoprotein |
| 3003330  | G→A       | 100%  | L371L<br>(CTC→CTT)            | <i>ygeV</i> ←                    | DNA-binding transcriptional regulator                                |
| 3049815  | G→T       | 100%  | R387S<br>(CGC→AGC)            | <i>visC</i> ←                    | oxidoreductase                                                       |
| 3397813  | C→G       | 100%  | D141H<br>(GAT→CAT)            | <i>yhdE</i> ←                    | hypothetical protein                                                 |
| 3449851  | G→A       | 100%  | A494V<br>(GCG→GTG)            | <i>rpoC</i> ←                    | RNA polymerase, beta prime subunit                                   |
| 3742936  | Δ1,336 bp | 100%  |                               | <i>insD-insC</i>                 | <i>insD, insC</i>                                                    |
| 3746911  | Δ1,199 bp | 100%  |                               | <i>insH</i>                      | <i>insH</i>                                                          |
| 3750122  | Δ1 bp     | 100%  | coding<br>(365/1416 nt)       | <i>tnaA</i> ←                    | tryptophanase/L-cysteine desulfhydrase, PLP-dependent                |
| 3750591  | Δ1,199 bp | 100%  |                               | <i>insH</i>                      | <i>insH</i>                                                          |
| 3898657  | C→G       | 100%  | L259V<br>(CTG→GTG)            | <i>yiaJ</i> →                    | DNA-binding transcriptional repressor                                |
| 3958123  | Δ34 bp    | 100%  | coding<br>(1156-1189/1287 nt) | <i>dctA</i> →                    | C4-dicarboxylic acid, orotate and citrate transporter                |
| 4090749  | A→T       | 100%  | Q135L<br>(CAG→CTG)            | <i>malQ</i> →                    | 4-alpha-glucanotransferase                                           |
| 4165991  | A→C       | 100%  | K43T                          | <i>rpsL</i> →                    | 30S ribosomal                                                        |

| position | mutation  | freq | annotation                | gene                             | description                                                                                                                                                       |
|----------|-----------|------|---------------------------|----------------------------------|-------------------------------------------------------------------------------------------------------------------------------------------------------------------|
|          |           |      | (AAA→ACA)                 |                                  | protein S12                                                                                                                                                       |
| 4310363  | Δ1,199 bp | 100% |                           | <i>insH</i> –[ <i>alsK</i> ]     | <i>insH</i> , [ <i>alsK</i> ]                                                                                                                                     |
| 4371271  | Δ2 bp     | 100% | intergenic<br>(-6/+299)   | <i>dcuA</i> ← / ←<br><i>aspA</i> | C4-dicarboxylate<br>antiporter/aspartate<br>ammonia-lyase                                                                                                         |
| 4519481  | T→C       | 4.6% | D626G<br>(GAT→GGT)        | <i>fecA</i> ←                    | ferric citrate<br>outer<br>membrane<br>transporter                                                                                                                |
| 4546535  | T→A       | 100% | intergenic<br>(+296/-182) | <i>fimB</i> → / →<br><i>fimE</i> | tyrosine<br>recombinase/in<br>version of<br>on/off regulator<br>of<br><i>fimA</i> /tyrosine<br>recombinase/in<br>version of<br>on/off regulator<br>of <i>fimA</i> |

**Table 3.3 (LCV, isolate 1)**

| position | mutation   | freq | annotation              | gene                                | description                                                                        |
|----------|------------|------|-------------------------|-------------------------------------|------------------------------------------------------------------------------------|
| 66457    | C → A      | 100% | V32F<br>(GTT → TTT)     | <i>araD</i> ←                       | L-ribulose-5-phosphate<br>4-epimerase                                              |
| 97880    | C → T      | 100% | S265F<br>(TCC → TTC)    | <i>murD</i> →                       | UDP-N-acetyl<br>muramoyl-L-alanine:D-glutamate<br>ligase                           |
| 167632   | C → A      | 100% | P50Q<br>(CCG → CAG)     | <i>fhuA</i> →                       | ferrichrome<br>outer<br>membrane<br>transporter                                    |
| 274547   | A → G      | 100% | intergenic<br>(-206/-2) | <i>insH</i> ← / →<br><i>mmuP</i>    | IS5<br>transposase<br>and<br>trans-activator/<br>S-methylmethionine<br>transporter |
| 274733   | Δ97,240 bp | 100% |                         | [ <i>mmuP</i> ]–<br>[ <i>mhpD</i> ] | <b>90 genes</b><br>[ <i>mmuP</i> ],                                                |

|        |       |      |                         |                               |                                                                                                                                                                                                                                                                                                                                                                                                                                                                                                                                                                         |
|--------|-------|------|-------------------------|-------------------------------|-------------------------------------------------------------------------------------------------------------------------------------------------------------------------------------------------------------------------------------------------------------------------------------------------------------------------------------------------------------------------------------------------------------------------------------------------------------------------------------------------------------------------------------------------------------------------|
|        |       |      |                         |                               | <i>mmuM, afuC, afuB, insB, insA, ykgN, yagB, yagA, yagE, yagF, yagG, yagH, yagI, argF, insB, insA, yagJ, yagK, yagL, yagM, yagN, intF, yagP, yagQ, yagR, yagS, yagT, yagU, ykgJ, yagV, yagW, yagX, yagY, yagZ, ykgK, ykgL, Y75_p4288, Y75_p4289, eaeH, insE, insF, ykgA, ykgB, ykgI, ykgC, ykgD, ykgE, ykgF, ykgG, ykgH, betA, betB, betI, betT, yahA, yahB, yahC, yahD, yahE, yahF, yahG, yahH, yahI, yahJ, yahK, yahL, yahM, yahN, yahO, prpR, prpB, prpC, prpD, prpE, codB, codA, cynR, cynT, cynS, cynX, lacA, lacY, lacZ, lacI, mhpR, mhpA, mhpB, mhpC, [mhpD]</i> |
| 547694 | A → G | 100% | intergenic (+123/-1156) | <i>fdrA</i> → / → <i>ylbF</i> | acyl-CoA synthetase with NAD(P)-binding Rossmann-fold                                                                                                                                                                                                                                                                                                                                                                                                                                                                                                                   |

|         |           |       |                         |                                  |                                                                                                            |
|---------|-----------|-------|-------------------------|----------------------------------|------------------------------------------------------------------------------------------------------------|
|         |           |       |                         |                                  | domain/hypothetical protein                                                                                |
| 547831  | +G        | 100%  | intergenic (+260/-1019) | <i>fdrA</i> → / →<br><i>ylbF</i> | acyl-CoA synthetase with NAD(P)-binding Rossmann-fold domain/hypothetical protein                          |
| 556858  | A → T     | 100%  | L36Q (CTG → CAG)        | <i>folD</i> ←                    | bifunctional 5,10-methylene-tetrahydrofolate dehydrogenase /5,10-methylene-tetrahydrofolate cyclohydrolase |
| 569996  | G → C     | 100%  | intergenic (+345/-120)  | <i>ybcK</i> → / →<br><i>ybcL</i> | recombinase/kinase inhibitor                                                                               |
| 654214  | Δ1,199 bp | 100%  |                         | <i>insH</i>                      | <i>insH</i>                                                                                                |
| 749354  | C → A     | 100%  | P17P (CCG → CCT)        | <i>ybgO</i> ←                    | fimbrial-like adhesin protein                                                                              |
| 758440  | C → A     | 100%  | F110L (TTC → TTA)       | <i>sdhB</i> →                    | succinate dehydrogenase, FeS subunit                                                                       |
| 758562  | T → A     | 100%  | L151H (CTC → CAC)       | <i>sdhB</i> →                    | succinate dehydrogenase, FeS subunit                                                                       |
| 887234  | C → A     | 100%  | A176A (GCG → GCT)       | <i>ybjJ</i> ←                    | transporter                                                                                                |
| 987574  | G → T     | 100%  | intergenic (-170/+433)  | <i>ompF</i> ← / ←<br><i>asnS</i> | outer membrane porin 1a (Ia;b;F)/asparaginyl tRNA synthetase                                               |
| 1093686 | T → C     | 100%  | V130A (GTA → GCA)       | <i>ycdT</i> →                    | diguanylate cyclase                                                                                        |
| 1097580 | C → T     | 19.1% | intergenic (+329/+226)  | <i>ycdU</i> → / ←<br><i>serX</i> | inner membrane protein/tRNA-Ser                                                                            |
| 1170573 | C → T     | 100%  | intergenic (-164/-77)   | <i>ycfQ</i> ← / →<br><i>ycfR</i> | DNA-binding transcriptional regulator/hypothetical protein                                                 |

|         |            |      |                          |                                  |                                                                                                                                                                                                                                                                                                                                                |
|---------|------------|------|--------------------------|----------------------------------|------------------------------------------------------------------------------------------------------------------------------------------------------------------------------------------------------------------------------------------------------------------------------------------------------------------------------------------------|
| 1197797 | C → T      | 100% | H366H<br>(CAC → CAT)     | <i>icd</i> →                     | isocitrate<br>dehydrogenase<br>, -specific for<br>NADP+                                                                                                                                                                                                                                                                                        |
| 1301041 | Δ1,336 bp  | 100% |                          | <i>insC-insD</i>                 | <i>insC, insD</i>                                                                                                                                                                                                                                                                                                                              |
| 1318876 | G → A      | 100% | P21S<br>(CCT → TCT)      | <i>trpA</i> ←                    | tryptophan<br>synthase<br>subunit alpha                                                                                                                                                                                                                                                                                                        |
| 1413639 | Δ23,060 bp | 100% |                          | <i>[ydaO]-ynaE</i>               | <b>30 genes</b><br><i>[ydaO], intR,</i><br><i>ydaQ, ydaC,</i><br><i>lar, recT, recE,</i><br><i>racC, ydaE,</i><br><i>kil, sieB, ydaF,</i><br><i>ydaG, racR,</i><br><i>ydaS, ydaT,</i><br><i>ydaU, ydaV,</i><br><i>ydaW, rzpR,</i><br><i>rzoR, trkG,</i><br><i>ynaK, ydaY,</i><br><i>ynaA, insH,</i><br><i>stfR, tfaR,</i><br><i>pinR, ynaE</i> |
| 1483588 | G → A      | 100% | L322L<br>(CTG → CTA)     | <i>ynbD</i> →                    | phosphatase,<br>inner<br>membrane<br>protein                                                                                                                                                                                                                                                                                                   |
| 1496775 | Δ1 bp      | 100% | coding (11/924<br>nt)    | <i>ydcI</i> ←                    | DNA-binding<br>transcriptional<br>regulator                                                                                                                                                                                                                                                                                                    |
| 1555625 | G → A      | 100% | intergenic<br>(-73/+61)  | <i>adhP</i> ← / ←<br><i>sfcA</i> | alcohol<br>dehydrogenase<br>, 1-propanol<br>preferring/mala<br>te<br>dehydrogenase<br>,<br>NAD-requiring                                                                                                                                                                                                                                       |
| 1615814 | C → A      | 100% | D202Y<br>(GAC → TAC)     | <i>yneI</i> ←                    | aldehyde<br>dehydrogenase                                                                                                                                                                                                                                                                                                                      |
| 1669599 | Δ1 bp      | 100% | coding<br>(680/1221 nt)  | <i>dgsA</i> ←                    | DNA-binding<br>transcriptional<br>repressor                                                                                                                                                                                                                                                                                                    |
| 1844073 | G → A      | 100% | intergenic<br>(-224/-12) | <i>ynjH</i> ← / →<br><i>gdhA</i> | hypothetical<br>protein/glutam<br>ate<br>dehydrogenase<br>,                                                                                                                                                                                                                                                                                    |

|         |           |       |                                |                                  |                                                                                        |
|---------|-----------|-------|--------------------------------|----------------------------------|----------------------------------------------------------------------------------------|
|         |           |       |                                |                                  | NADP-specific                                                                          |
| 1918872 | T → A     | 100%  | S301T<br>(TCC → ACC)           | <i>yebS</i> →                    | inner<br>membrane<br>protein                                                           |
| 1973476 | G → A     | 100%  | L310L<br>(CTC → CTT)           | <i>tar</i> ←                     | methyl-accepting<br>chemotaxis<br>protein II                                           |
| 2005401 | C → T     | 100%  | E115K<br>(GAA → AAA)           | <i>fliC</i> ←                    | flagellar<br>filament<br>structural<br>protein                                         |
| 2170094 | C → A     | 100%  | intergenic<br>(-437/+32)       | <i>ogrK</i> ← / ←<br><i>yegR</i> | DNA-binding<br>transcriptional<br>regulator/hypothetical<br>protein                    |
| 2320795 | Δ1,336 bp | 100%  |                                | <i>insD-insC</i>                 | <i>insD, insC</i>                                                                      |
| 2406075 | C → T     | 100%  | V51I<br>(GTT → ATT)            | <i>nuoF</i> ←                    | NADH:ubiquinone<br>oxidoreductase,<br>chain F                                          |
| 2416102 | G → A     | 100%  | L233L<br>(CTG → TTG)           | <i>yfbS</i> ←                    | transporter                                                                            |
| 2538628 | C → T     | 100%  | T258T<br>(ACC → ACT)           | <i>cysK</i> →                    | cysteine<br>synthase A,<br>O-acetylserine<br>sulfhydrylase<br>A subunit                |
| 2866111 | A → G     | 100%  | intergenic<br>(-21/+159)       | <i>rpoS</i> ← / ←<br><i>nlpD</i> | RNA<br>polymerase,<br>sigma S (sigma<br>38)<br>factor/outer<br>membrane<br>lipoprotein |
| 3003330 | G → A     | 100%  | L371L<br>(CTC → CTT)           | <i>ygeV</i> ←                    | DNA-binding<br>transcriptional<br>regulator                                            |
| 3049815 | G → T     | 100%  | R387S<br>(CGC → AGC)           | <i>visC</i> ←                    | oxidoreductase                                                                         |
| 3397813 | C → G     | 100%  | D141H<br>(GAT → CAT)           | <i>yhdE</i> ←                    | hypothetical<br>protein                                                                |
| 3406254 | Δ3 bp     | 12.3% | coding<br>(483-485/1350<br>nt) | <i>accC</i> →                    | acetyl-CoA<br>carboxylase,<br>biotin<br>carboxylase<br>subunit                         |



|         |                   |       |                               |                                  |                                                                                                                                                                      |
|---------|-------------------|-------|-------------------------------|----------------------------------|----------------------------------------------------------------------------------------------------------------------------------------------------------------------|
| 3742936 | $\Delta$ 1,336 bp | 100%  |                               | <i>insD-insC</i>                 | <i>insD, insC</i>                                                                                                                                                    |
| 3746911 | $\Delta$ 1,199 bp | 100%  |                               | <i>insH</i>                      | <i>insH</i>                                                                                                                                                          |
| 3750122 | $\Delta$ 1 bp     | 95.0% | coding<br>(365/1416 nt)       | <i>tnaA</i> ←                    | tryptophanase/<br>L-cysteine<br>desulfhydrase,<br>PLP-dependent                                                                                                      |
| 3750123 | C → T             | 4.6%  | G122S<br>(GGC → AGC)          | <i>tnaA</i> ←                    | tryptophanase/<br>L-cysteine<br>desulfhydrase,<br>PLP-dependent                                                                                                      |
| 3898657 | C → G             | 100%  | L259V<br>(CTG → GTG)          | <i>yiaJ</i> →                    | DNA-binding<br>transcriptional<br>repressor                                                                                                                          |
| 3958123 | $\Delta$ 34 bp    | 100%  | coding<br>(1156-1189/1287 nt) | <i>dctA</i> →                    | C4-dicarboxylic<br>acid, orotate<br>and citrate<br>transporter                                                                                                       |
| 4090749 | A → T             | 100%  | Q135L<br>(CAG → CTG)          | <i>malQ</i> →                    | 4-alpha-glucan<br>otransferase                                                                                                                                       |
| 4165991 | A → C             | 100%  | K43T<br>(AAA → ACA)           | <i>rpsL</i> →                    | 30S ribosomal<br>protein S12                                                                                                                                         |
| 4310363 | $\Delta$ 1,199 bp | 100%  |                               | <i>insH-[alsK]</i>               | <i>insH, [alsK]</i>                                                                                                                                                  |
| 4371271 | $\Delta$ 2 bp     | 100%  | intergenic<br>(-6/+299)       | <i>dcuA</i> ← / ←<br><i>aspA</i> | C4-dicarboxylate<br>antiporter/aspartate<br>ammonia-lyase                                                                                                            |
| 4546535 | T → A             | 100%  | intergenic<br>(+296/-182)     | <i>fimB</i> → / →<br><i>fimE</i> | tyrosine<br>recombinase/in<br>version of<br>on/off<br>regulator of<br><i>fimA</i> /tyrosine<br>recombinase/in<br>version of<br>on/off<br>regulator of<br><i>fimA</i> |

**Table 3.4 (LCV, isolate2)**

| position | mutation | freq | annotation          | gene          | description                           |
|----------|----------|------|---------------------|---------------|---------------------------------------|
| 66457    | C → A    | 100% | V32F<br>(GTT → TTT) | <i>araD</i> ← | L-ribulose-5-phosphate<br>4-epimerase |
| 97880    | C → T    | 100% | S265F               | <i>murD</i> → | UDP-N-acetyl                          |

|        |            |      |                         |                                     |                                                                                                                                                                                                                                                                                                                                                                                                                                                                                                                                                                                                                                                                                                                                                                                                                                                                                                                                                                                                                                                                                                                                                |
|--------|------------|------|-------------------------|-------------------------------------|------------------------------------------------------------------------------------------------------------------------------------------------------------------------------------------------------------------------------------------------------------------------------------------------------------------------------------------------------------------------------------------------------------------------------------------------------------------------------------------------------------------------------------------------------------------------------------------------------------------------------------------------------------------------------------------------------------------------------------------------------------------------------------------------------------------------------------------------------------------------------------------------------------------------------------------------------------------------------------------------------------------------------------------------------------------------------------------------------------------------------------------------|
|        |            |      | (TCC → TTC)             |                                     | muramoyl-L-alanine:D-glutamate ligase                                                                                                                                                                                                                                                                                                                                                                                                                                                                                                                                                                                                                                                                                                                                                                                                                                                                                                                                                                                                                                                                                                          |
| 167632 | C → A      | 100% | P50Q<br>(CCG → CAG)     | <i>fhuA</i> →                       | ferrichrome outer membrane transporter                                                                                                                                                                                                                                                                                                                                                                                                                                                                                                                                                                                                                                                                                                                                                                                                                                                                                                                                                                                                                                                                                                         |
| 274547 | A → G      | 100% | intergenic<br>(-206/-2) | <i>insH</i> ← / →<br><i>mmuP</i>    | IS5 transposase and trans-activator/S-methylmethionine transporter                                                                                                                                                                                                                                                                                                                                                                                                                                                                                                                                                                                                                                                                                                                                                                                                                                                                                                                                                                                                                                                                             |
| 274733 | Δ97,240 bp | 100% |                         | [ <i>mmuP</i> ]-<br>[ <i>mhpD</i> ] | <b>90 genes</b><br>[ <i>mmuP</i> ],<br><i>mmuM</i> , <i>afuC</i> ,<br><i>afuB</i> , <i>insB</i> ,<br><i>insA</i> , <i>ykgN</i> ,<br><i>yagB</i> , <i>yagA</i> ,<br><i>yagE</i> , <i>yagF</i> ,<br><i>yagG</i> , <i>yagH</i> ,<br><i>yagI</i> , <i>argF</i> ,<br><i>insB</i> , <i>insA</i> ,<br><i>yagJ</i> , <i>yagK</i> ,<br><i>yagL</i> , <i>yagM</i> ,<br><i>yagN</i> , <i>intF</i> ,<br><i>yagP</i> , <i>yagQ</i> ,<br><i>yagR</i> , <i>yagS</i> ,<br><i>yagT</i> , <i>yagU</i> ,<br><i>ykgJ</i> , <i>yagV</i> ,<br><i>yagW</i> , <i>yagX</i> ,<br><i>yagY</i> , <i>yagZ</i> ,<br><i>ykgK</i> , <i>ykgL</i> ,<br><i>Y75_p4288</i> ,<br><i>Y75_p4289</i> ,<br><i>eaeH</i> , <i>insE</i> ,<br><i>insF</i> , <i>ykgA</i> ,<br><i>ykgB</i> , <i>ykgI</i> ,<br><i>ykgC</i> , <i>ykgD</i> ,<br><i>ykgE</i> , <i>ykgF</i> ,<br><i>ykgG</i> , <i>ykgH</i> ,<br><i>betA</i> , <i>betB</i> ,<br><i>betI</i> , <i>betT</i> ,<br><i>yahA</i> , <i>yahB</i> ,<br><i>yahC</i> , <i>yahD</i> ,<br><i>yahE</i> , <i>yahF</i> ,<br><i>yahG</i> , <i>yahH</i> ,<br><i>yahI</i> , <i>yahJ</i> ,<br><i>yahK</i> , <i>yahL</i> ,<br><i>yahM</i> , <i>yahN</i> , |

|        |       |      |                         |                               |                                                                                                                                              |
|--------|-------|------|-------------------------|-------------------------------|----------------------------------------------------------------------------------------------------------------------------------------------|
|        |       |      |                         |                               | <b><i>yahO, prpR, prpB, prpC, prpD, prpE, codB, codA, cynR, cynT, cynS, cynX, lacA, lacY, lacZ, lacI, mhpR, mhpA, mhpB, mhpC, [mhpD]</i></b> |
| 547694 | A → G | 100% | intergenic (+123/-1156) | <i>fdrA</i> → / → <i>ylbF</i> | acyl-CoA synthetase with NAD(P)-binding Rossmann-fold domain/hypothetical protein                                                            |
| 547831 | +G    | 100% | intergenic (+260/-1019) | <i>fdrA</i> → / → <i>ylbF</i> | acyl-CoA synthetase with NAD(P)-binding Rossmann-fold domain/hypothetical protein                                                            |
| 556858 | A → T | 100% | L36Q (CTG → CAG)        | <i>fold</i> ←                 | bifunctional 5,10-methylene-tetrahydrofolate dehydrogenase /5,10-methylene-tetrahydrofolate cyclohydrolase                                   |
| 569996 | G → C | 100% | intergenic (+345/-120)  | <i>ybcK</i> → / → <i>ybcL</i> | recombinase/kinase inhibitor                                                                                                                 |
| 749354 | C → A | 100% | P17P (CCG → CCT)        | <i>ybgO</i> ←                 | fimbrial-like adhesin protein                                                                                                                |
| 758440 | C → A | 100% | F110L (TTC → TTA)       | <i>sdhB</i> →                 | succinate dehydrogenase, FeS subunit                                                                                                         |
| 758562 | T → A | 100% | L151H (CTC → CAC)       | <i>sdhB</i> →                 | succinate dehydrogenase, FeS subunit                                                                                                         |
| 887234 | C → A | 100% | A176A (GCG → GCT)       | <i>ybjJ</i> ←                 | transporter                                                                                                                                  |
| 987574 | G → T | 100% | intergenic (-170/+433)  | <i>ompF</i> ← / ← <i>asnS</i> | outer membrane                                                                                                                               |

|         |            |       |                        |                               |                                                                                                                                                                                                              |
|---------|------------|-------|------------------------|-------------------------------|--------------------------------------------------------------------------------------------------------------------------------------------------------------------------------------------------------------|
|         |            |       |                        |                               | porin 1a (Ia;b;F)/asparaginyl tRNA synthetase                                                                                                                                                                |
| 1093686 | T → C      | 100%  | V130A (GTA → GCA)      | <i>ycdT</i> →                 | diguanylate cyclase                                                                                                                                                                                          |
| 1097580 | C → T      | 18.8% | intergenic (+329/+226) | <i>ycdU</i> → / ← <i>serX</i> | inner membrane protein/tRNA-Ser                                                                                                                                                                              |
| 1170573 | C → T      | 100%  | intergenic (-164/-77)  | <i>ycfQ</i> ← / → <i>ycfR</i> | DNA-binding transcriptional regulator/hypothetical protein                                                                                                                                                   |
| 1197797 | C → T      | 100%  | H366H (CAC → CAT)      | <i>icd</i> →                  | isocitrate dehydrogenase, -specific for NADP+                                                                                                                                                                |
| 1301041 | Δ1,336 bp  | 100%  |                        | <i>insC-insD</i>              | <i>insC, insD</i>                                                                                                                                                                                            |
| 1318876 | G → A      | 100%  | P21S (CCT → TCT)       | <i>trpA</i> ←                 | tryptophan synthase subunit alpha                                                                                                                                                                            |
| 1413639 | Δ23,060 bp | 100%  |                        | <i>[ydaO]-ynaE</i>            | <b>30 genes</b><br><i>[ydaO], intR, ydaQ, ydaC, lar, recT, recE, racC, ydaE, kil, sieB, ydaF, ydaG, racR, ydaS, ydaT, ydaU, ydaV, ydaW, rzpR, rzoR, trkG, ynaK, ydaY, ynaA, insH, stfR, tfaR, pinR, ynaE</i> |
| 1483588 | G → A      | 100%  | L322L (CTG → CTA)      | <i>ynbD</i> →                 | phosphatase, inner membrane protein                                                                                                                                                                          |
| 1496775 | Δ1 bp      | 100%  | coding (11/924 nt)     | <i>ydcI</i> ←                 | DNA-binding transcriptional regulator                                                                                                                                                                        |
| 1555625 | G → A      | 100%  | intergenic (-73/+61)   | <i>adhP</i> ← / ← <i>sfcA</i> | alcohol dehydrogenase, 1-propanol                                                                                                                                                                            |

|         |           |      |                        |                               |                                                             |
|---------|-----------|------|------------------------|-------------------------------|-------------------------------------------------------------|
|         |           |      |                        |                               | preferring/malate dehydrogenase, NAD-requiring              |
| 1615814 | C → A     | 100% | D202Y (GAC → TAC)      | <i>yneI</i> ←                 | aldehyde dehydrogenase                                      |
| 1669599 | Δ1 bp     | 100% | coding (680/1221 nt)   | <i>dgsA</i> ←                 | DNA-binding transcriptional repressor                       |
| 1844073 | G → A     | 100% | intergenic (-224/-12)  | <i>ynjH</i> ← / → <i>gdhA</i> | hypothetical protein/glutamate dehydrogenase, NADP-specific |
| 1907281 | C → A     | 1.9% | intergenic (+308/-121) | <i>yobD</i> → / → <i>yebN</i> | inner membrane protein/inner membrane protein               |
| 1918872 | T → A     | 100% | S301T (TCC → ACC)      | <i>yebS</i> →                 | inner membrane protein                                      |
| 1973476 | G → A     | 100% | L310L (CTC → CTT)      | <i>tar</i> ←                  | methyl-accepting chemotaxis protein II                      |
| 2005401 | C → T     | 100% | E115K (GAA → AAA)      | <i>fliC</i> ←                 | flagellar filament structural protein                       |
| 2170094 | C → A     | 100% | intergenic (-437/+32)  | <i>ogrK</i> ← / ← <i>yegR</i> | DNA-binding transcriptional regulator/hypothetical protein  |
| 2320795 | Δ1,336 bp | 100% |                        | <i>insD-insC</i>              | <i>insD, insC</i>                                           |
| 2406075 | C → T     | 100% | V51I (GTT → ATT)       | <i>nuoF</i> ←                 | NADH:ubiquinone oxidoreductase, chain F                     |
| 2416102 | G → A     | 100% | L233L (CTG → TTG)      | <i>yfbS</i> ←                 | transporter                                                 |
| 2538628 | C → T     | 100% | T258T (ACC → ACT)      | <i>cysK</i> →                 | cysteine synthase A, O-acetylserine sulfhydrylase A subunit |

|         |           |      |                               |                                  |                                                                                                         |
|---------|-----------|------|-------------------------------|----------------------------------|---------------------------------------------------------------------------------------------------------|
| 2866111 | A → G     | 100% | intergenic<br>(-21/+159)      | <i>rpoS</i> ← / ←<br><i>nlpD</i> | RNA polymerase, sigma S (sigma 38) factor/outer membrane lipoprotein                                    |
| 3003330 | G → A     | 100% | L371L<br>(CTC → CTT)          | <i>ygeV</i> ←                    | DNA-binding transcriptional regulator                                                                   |
| 3049815 | G → T     | 100% | R387S<br>(CGC → AGC)          | <i>visC</i> ←                    | oxidoreductase                                                                                          |
| 3397813 | C → G     | 100% | D141H<br>(GAT → CAT)          | <i>yhdE</i> ←                    | hypothetical protein                                                                                    |
| 3742936 | Δ1,336 bp | 100% |                               | <i>insD-insC</i>                 | <i>insD, insC</i>                                                                                       |
| 3750122 | Δ1 bp     | 100% | coding<br>(365/1416 nt)       | <i>tnaA</i> ←                    | tryptophanase/L-cysteine desulfhydrase, PLP-dependent                                                   |
| 3750591 | Δ1,199 bp | 100% |                               | <i>insH</i>                      | <i>insH</i>                                                                                             |
| 3898657 | C → G     | 100% | L259V<br>(CTG → GTG)          | <i>yiaJ</i> →                    | DNA-binding transcriptional repressor                                                                   |
| 3958123 | Δ34 bp    | 100% | coding<br>(1156-1189/1287 nt) | <i>dctA</i> →                    | C4-dicarboxylic acid, orotate and citrate transporter                                                   |
| 4090749 | A → T     | 100% | Q135L<br>(CAG → CTG)          | <i>malQ</i> →                    | 4-alpha-glucanotransferase                                                                              |
| 4165991 | A → C     | 100% | K43T<br>(AAA → ACA)           | <i>rpsL</i> →                    | 30S ribosomal protein S12                                                                               |
| 4310363 | Δ1,199 bp | 100% |                               | <i>insH-[alsK]</i>               | <i>insH, [alsK]</i>                                                                                     |
| 4353540 | T → C     | 1.1% | intergenic<br>(-118/+453)     | <i>dcuB</i> ← / ←<br><i>dcuR</i> | C4-dicarboxylate antiporter/DNA-binding response regulator in two-component regulatory system with DcuS |
| 4371271 | Δ2 bp     | 100% | intergenic<br>(-6/+299)       | <i>dcuA</i> ← / ←<br><i>aspA</i> | C4-dicarboxylate antiporter/aspartate                                                                   |

|         |       |      |                           |                                  |                                                                                                                                                                      |
|---------|-------|------|---------------------------|----------------------------------|----------------------------------------------------------------------------------------------------------------------------------------------------------------------|
|         |       |      |                           |                                  | ammonia-lyase                                                                                                                                                        |
| 4546535 | T → A | 100% | intergenic<br>(+296/-182) | <i>fimB</i> → / →<br><i>fimE</i> | tyrosine<br>recombinase/in<br>version of<br>on/off<br>regulator of<br><i>fimA</i> /tyrosine<br>recombinase/in<br>version of<br>on/off<br>regulator of<br><i>fimA</i> |

**Table 3.5 (Mixed population)**

| position | mutation   | freq | annotation              | gene                                | description                                                                                                                                                                                                                                                                                                                                                                                                                                            |
|----------|------------|------|-------------------------|-------------------------------------|--------------------------------------------------------------------------------------------------------------------------------------------------------------------------------------------------------------------------------------------------------------------------------------------------------------------------------------------------------------------------------------------------------------------------------------------------------|
| 66457    | C → A      | 100% | V32F<br>(GTT → TTT)     | <i>araD</i> ←                       | L-ribulose-5-p<br>hosphate<br>4-epimerase                                                                                                                                                                                                                                                                                                                                                                                                              |
| 97880    | C → T      | 100% | S265F<br>(TCC → TTC)    | <i>murD</i> →                       | UDP-N-acetyl<br>muramoyl-L-al<br>anine:D-gluta<br>mate ligase                                                                                                                                                                                                                                                                                                                                                                                          |
| 167632   | C → A      | 100% | P50Q<br>(CCG → CAG)     | <i>fhuA</i> →                       | ferrichrome<br>outer<br>membrane<br>transporter                                                                                                                                                                                                                                                                                                                                                                                                        |
| 274547   | A → G      | 100% | intergenic<br>(-206/-2) | <i>insH</i> ← / →<br><i>mmuP</i>    | IS5<br>transposase<br>and<br>trans-activator/<br>S-methylmethi<br>onine<br>transporter                                                                                                                                                                                                                                                                                                                                                                 |
| 274733   | Δ97,240 bp | 100% |                         | [ <i>mmuP</i> ]-<br>[ <i>mhpD</i> ] | <b>90 genes</b><br>[ <i>mmuP</i> ],<br><i>mmuM</i> , <i>afuC</i> ,<br><i>afuB</i> , <i>insB</i> ,<br><i>insA</i> , <i>ykgN</i> ,<br><i>yagB</i> , <i>yagA</i> ,<br><i>yagE</i> , <i>yagF</i> ,<br><i>yagG</i> , <i>yagH</i> ,<br><i>yagI</i> , <i>argF</i> ,<br><i>insB</i> , <i>insA</i> ,<br><i>yagJ</i> , <i>yagK</i> ,<br><i>yagL</i> , <i>yagM</i> ,<br><i>yagN</i> , <i>intF</i> ,<br><i>yagP</i> , <i>yagQ</i> ,<br><i>yagR</i> , <i>yagS</i> , |

|        |       |      |                         |                               |                                                                                                                                                                                                                                                                                                                                                                                                                    |
|--------|-------|------|-------------------------|-------------------------------|--------------------------------------------------------------------------------------------------------------------------------------------------------------------------------------------------------------------------------------------------------------------------------------------------------------------------------------------------------------------------------------------------------------------|
|        |       |      |                         |                               | <p><b>yagT, yagU, ykgJ, yagV, yagW, yagX, yagY, yagZ, ykgK, ykgL, Y75_p4288, Y75_p4289, eaeH, insE, insF, ykgA, ykgB, ykgI, ykgC, ykgD, ykgE, ykgF, ykgG, ykgH, betA, betB, betI, betT, yahA, yahB, yahC, yahD, yahE, yahF, yahG, yahH, yahI, yahJ, yahK, yahL, yahM, yahN, yahO, prpR, prpB, prpC, prpD, prpE, codB, codA, cynR, cynT, cynS, cynX, lacA, lacY, lacZ, lacI, mhpR, mhpA, mhpB, mhpC, [mhpD]</b></p> |
| 547694 | A → G | 100% | intergenic (+123/-1156) | <i>fdrA</i> → / → <i>ylbF</i> | acyl-CoA synthetase with NAD(P)-binding Rossmann-fold domain/hypothetical protein                                                                                                                                                                                                                                                                                                                                  |
| 547831 | +G    | 100% | intergenic (+260/-1019) | <i>fdrA</i> → / → <i>ylbF</i> | acyl-CoA synthetase with NAD(P)-binding Rossmann-fold domain/hypothetical protein                                                                                                                                                                                                                                                                                                                                  |
| 556858 | A → T | 100% | L36Q (CTG → CAG)        | <i>folD</i> ←                 | bifunctional 5,10-methylene-tetrahydrofolate                                                                                                                                                                                                                                                                                                                                                                       |



|         |           |       |                        |                               |                                                               |
|---------|-----------|-------|------------------------|-------------------------------|---------------------------------------------------------------|
|         |           |       |                        |                               | dehydrogenase /5,10-methylene-tetrahydrofolate cyclohydrolase |
| 569996  | G → C     | 100%  | intergenic (+345/-120) | <i>ybcK</i> → / → <i>ybcL</i> | recombinase/kinase inhibitor                                  |
| 654214  | Δ1,199 bp | 100%  |                        | <i>insH</i>                   | <i>insH</i>                                                   |
| 749354  | C → A     | 100%  | P17P (CCG → CCT)       | <i>ybgO</i> ←                 | fimbrial-like adhesin protein                                 |
| 758440  | C → A     | 44.7% | F110L (TTC → TTA)      | <i>sdhB</i> →                 | succinate dehydrogenase, FeS subunit                          |
| 758562  | T → A     | 5.2%  | L151H (CTC → CAC)      | <i>sdhB</i> →                 | succinate dehydrogenase, FeS subunit                          |
| 887234  | C → A     | 100%  | A176A (GCG → GCT)      | <i>ybjJ</i> ←                 | transporter                                                   |
| 987574  | G → T     | 100%  | intergenic (-170/+433) | <i>ompF</i> ← / ← <i>asnS</i> | outer membrane porin 1a (Ia;b;F)/asparaginyl tRNA synthetase  |
| 1093686 | T → C     | 100%  | V130A (GTA → GCA)      | <i>ycdT</i> →                 | diguanylate cyclase                                           |
| 1097580 | C → T     | 18.4% | intergenic (+329/+226) | <i>ycdU</i> → / ← <i>serX</i> | inner membrane protein/tRNA-Ser                               |
| 1170573 | C → T     | 100%  | intergenic (-164/-77)  | <i>ycfQ</i> ← / → <i>ycfR</i> | DNA-binding transcriptional regulator/hypothetical protein    |
| 1197797 | C → T     | 3.2%  | H366H (CAC → CAT)      | <i>icd</i> →                  | isocitrate dehydrogenase, -specific for NADP+                 |
| 1197809 | C → T     | 2.7%  | T370T (ACC → ACT)      | <i>icd</i> →                  | isocitrate dehydrogenase, -specific for NADP+                 |
| 1197822 | T → C     | 2.6%  | L375L (TTA → CTA)      | <i>icd</i> →                  | isocitrate dehydrogenase, -specific for NADP+                 |

|         |            |      |                      |                                  |                                                                                                                                                                                                              |
|---------|------------|------|----------------------|----------------------------------|--------------------------------------------------------------------------------------------------------------------------------------------------------------------------------------------------------------|
| 1197824 | A → G      | 2.6% | L375L<br>(TTA → TTG) | <i>icd</i> →                     | isocitrate dehydrogenase, -specific for NADP+                                                                                                                                                                |
| 1197857 | G → C      | 1.4% | A386A<br>(GCG → GCC) | <i>icd</i> →                     | isocitrate dehydrogenase, -specific for NADP+                                                                                                                                                                |
| 1301041 | Δ1,336 bp  | 100% |                      | <i>insC-insD</i>                 | <i>insC, insD</i>                                                                                                                                                                                            |
| 1306963 | C → T      | 5.1% | P166S<br>(CCG → TCG) | <i>oppD</i> →                    | oligopeptide transporter subunit                                                                                                                                                                             |
| 1318876 | G → A      | 100% | P21S<br>(CCT → TCT)  | <i>trpA</i> ←                    | tryptophan synthase subunit alpha                                                                                                                                                                            |
| 1413639 | Δ23,060 bp | 100% |                      | <i>[ydaO]-ynaE</i>               | <b>30 genes</b><br><i>[ydaO], intR, ydaQ, ydaC, lar, recT, recE, racC, ydaE, kil, sieB, ydaF, ydaG, racR, ydaS, ydaT, ydaU, ydaV, ydaW, rzpR, rzoR, trkG, ynaK, ydaY, ynaA, insH, stfR, tfaR, pinR, ynaE</i> |
| 1483588 | G → A      | 100% | L322L<br>(CTG → CTA) | <i>ynbD</i> →                    | phosphatase, inner membrane protein                                                                                                                                                                          |
| 1496775 | Δ1 bp      | 100% | coding (11/924 nt)   | <i>ydcI</i> ←                    | DNA-binding transcriptional regulator                                                                                                                                                                        |
| 1555625 | G → A      | 4.6% | intergenic (-73/+61) | <i>adhP</i> ← / ←<br><i>sfcA</i> | alcohol dehydrogenase, 1-propanol preferring/malate dehydrogenase, NAD-requiring                                                                                                                             |
| 1615814 | C → A      | 100% | D202Y<br>(GAC → TAC) | <i>yneI</i> ←                    | aldehyde dehydrogenase                                                                                                                                                                                       |

|         |           |       |                          |                                  |                                                                              |
|---------|-----------|-------|--------------------------|----------------------------------|------------------------------------------------------------------------------|
| 1669599 | Δ1 bp     | 100%  | coding<br>(680/1221 nt)  | <i>dgsA</i> ←                    | DNA-binding<br>transcriptional<br>repressor                                  |
| 1844073 | G → A     | 100%  | intergenic<br>(-224/-12) | <i>ynjH</i> ← / →<br><i>gdhA</i> | hypothetical<br>protein/glutam<br>ate<br>dehydrogenase<br>,<br>NADP-specific |
| 1918872 | T → A     | 100%  | S301T<br>(TCC → ACC)     | <i>yebS</i> →                    | inner<br>membrane<br>protein                                                 |
| 1973476 | G → A     | 100%  | L310L<br>(CTC → CTT)     | <i>tar</i> ←                     | methyl-accepti<br>ng chemotaxis<br>protein II                                |
| 2005401 | C → T     | 100%  | E115K<br>(GAA → AAA)     | <i>fliC</i> ←                    | flagellar<br>filament<br>structural<br>protein                               |
| 2170094 | C → A     | 100%  | intergenic<br>(-437/+32) | <i>ogrK</i> ← / ←<br><i>yegR</i> | DNA-binding<br>transcriptional<br>regulator/hypot<br>hetical protein         |
| 2320795 | Δ1,336 bp | 100%  |                          | <i>insD-insC</i>                 | <i>insD, insC</i>                                                            |
| 2406075 | C → T     | 100%  | V51I<br>(GTT → ATT)      | <i>nuoF</i> ←                    | NADH:ubiquin<br>one<br>oxidoreductase<br>, chain F                           |
| 2416102 | G → A     | 100%  | L233L<br>(CTG → TTG)     | <i>yfbS</i> ←                    | transporter                                                                  |
| 2538628 | C → T     | 100%  | T258T<br>(ACC → ACT)     | <i>cysK</i> →                    | cysteine<br>synthase A,<br>O-acetylserine<br>sulfhydrylase<br>A subunit      |
| 2733780 | T → A     | 11.3% | E296D<br>(GAA → GAT)     | <i>rluD</i> ←                    | 23S rRNA<br>pseudouridine<br>synthase                                        |
| 2865228 | A → G     | 5.1%  | L288P<br>(CTG → CCG)     | <i>rpoS</i> ←                    | RNA<br>polymerase,<br>sigma S (sigma<br>38) factor                           |
| 2865274 | +46 bp    | 21.5% | coding<br>(817/876 nt)   | <i>rpoS</i> ←                    | RNA<br>polymerase,<br>sigma S (sigma<br>38) factor                           |

|         |           |       |                               |                                  |                                                                      |
|---------|-----------|-------|-------------------------------|----------------------------------|----------------------------------------------------------------------|
| 2865278 | +92 bp    | 8.9%  | coding<br>(813/876 nt)        | <i>rpoS</i> ←                    | RNA polymerase, sigma S (sigma 38) factor                            |
| 2866111 | A → G     | 100%  | intergenic<br>(-21/+159)      | <i>rpoS</i> ← / ←<br><i>nlpD</i> | RNA polymerase, sigma S (sigma 38) factor/outer membrane lipoprotein |
| 3003330 | G → A     | 100%  | L371L<br>(CTC → CTT)          | <i>ygeV</i> ←                    | DNA-binding transcriptional regulator                                |
| 3049815 | G → T     | 100%  | R387S<br>(CGC → AGC)          | <i>visC</i> ←                    | oxidoreductase                                                       |
| 3397813 | C → G     | 100%  | D141H<br>(GAT → CAT)          | <i>yhdE</i> ←                    | hypothetical protein                                                 |
| 3449851 | G → A     | 13.6% | A494V<br>(GCG → GTG)          | <i>rpoC</i> ←                    | RNA polymerase, beta prime subunit                                   |
| 3450056 | C → A     | 22.3% | A426S<br>(GCA → TCA)          | <i>rpoC</i> ←                    | RNA polymerase, beta prime subunit                                   |
| 3742936 | Δ1,336 bp | 100%  |                               | <i>insD-insC</i>                 | <i>insD, insC</i>                                                    |
| 3746911 | Δ1,199 bp | 100%  |                               | <i>insH</i>                      | <i>insH</i>                                                          |
| 3750122 | Δ1 bp     | 97.5% | coding<br>(365/1416 nt)       | <i>tnaA</i> ←                    | tryptophanase/L-cysteine desulfhydrase, PLP-dependent                |
| 3750123 | C → T     | 2.5%  | G122S<br>(GGC → AGC)          | <i>tnaA</i> ←                    | tryptophanase/L-cysteine desulfhydrase, PLP-dependent                |
| 3898657 | C → G     | 100%  | L259V<br>(CTG → GTG)          | <i>viaJ</i> →                    | DNA-binding transcriptional repressor                                |
| 3958123 | Δ34 bp    | 99.6% | coding<br>(1156-1189/1287 nt) | <i>dctA</i> →                    | C4-dicarboxylic acid, orotate and citrate transporter                |
| 4090749 | A → T     | 100%  | Q135L<br>(CAG → CTG)          | <i>malQ</i> →                    | 4-alpha-glucanotransferase                                           |
| 4165991 | A → C     | 100%  | K43T                          | <i>rpsL</i> →                    | 30S ribosomal                                                        |

|         |           |       |                           |                                  |                                                                                                                                      |
|---------|-----------|-------|---------------------------|----------------------------------|--------------------------------------------------------------------------------------------------------------------------------------|
|         |           |       | (AAA → ACA)               |                                  | protein S12                                                                                                                          |
| 4200197 | A → G     | 36.1% | K271E<br>(AAA → GAA)      | <i>rpoA</i> →                    | RNA polymerase subunit alpha                                                                                                         |
| 4310363 | Δ1,199 bp | 100%  |                           | <i>insH</i> –[ <i>alsK</i> ]     | <i>insH</i> , [ <i>alsK</i> ]                                                                                                        |
| 4346527 | C → G     | 3.9%  | intergenic<br>(-221/-62)  | <i>melR</i> ← / →<br><i>melA</i> | DNA-binding transcriptional dual regulator/alpha-galactosidase                                                                       |
| 4346883 | T → A     | 3.3%  | F99I<br>(TTC → ATC)       | <i>melA</i> →                    | alpha-galactosidase                                                                                                                  |
| 4347339 | C → T     | 2.8%  | R251C<br>(CGC → TGC)      | <i>melA</i> →                    | alpha-galactosidase                                                                                                                  |
| 4371271 | Δ2 bp     | 100%  | intergenic<br>(-6/+299)   | <i>dcuA</i> ← / ←<br><i>aspA</i> | C4-dicarboxylate antiporter/aspartate ammonia-lyase                                                                                  |
| 4371461 | T → C     | 2.4%  | intergenic<br>(-196/+110) | <i>dcuA</i> ← / ←<br><i>aspA</i> | C4-dicarboxylate antiporter/aspartate ammonia-lyase                                                                                  |
| 4546535 | T → A     | 100%  | intergenic<br>(+296/-182) | <i>fimB</i> → / →<br><i>fimE</i> | tyrosine recombinase/inversion of on/off regulator of <i>fimA</i> /tyrosine recombinase/inversion of on/off regulator of <i>fimA</i> |
